# Supplementary material for: Dentate gyrus development requires a cortical hem-derived astrocytic scaffold
Source: eLife. 2021 Jan 4;10:e63904. doi: 10.7554/eLife.63904 (PMC7806271; doi:10.7554/eLife.63904)
Supplement: Figure 1—figure supplement 2—source data 1. [file elife-63904-fig1-figsupp2-data1.xlsx]

## Sheet: Sheet1
	Figure 1 - Figure Supplement 2.B		DG pixel area
			3 months old			Average	SD
	Sox9fl/+;Sox1+/+ (n=3)		54494	51851.8	60608.4	55651.4	4491.57
	Sox9fl/fl;Sox1Cre/+ (n=3)		39549.8	27759	33966.2	33758.3	5898.15
	Sox9fl/fl;Nestin-Cre (n=2)		60700.8	65287		62993.9	3242.93
	Sox9fl/+;Sox1Cre/+ (n=1)		57453.2			57453.2	0
