# Supplementary material for: Dentate gyrus development requires a cortical hem-derived astrocytic scaffold
Source: eLife. 2021 Jan 4;10:e63904. doi: 10.7554/eLife.63904 (PMC7806271; doi:10.7554/eLife.63904)
Supplement: Figure 1—figure supplement 3—source data 1. [file elife-63904-fig1-figsupp3-data1.xlsx]

## Sheet: Figure S.1
	Figure 1 - Figure Supplement 3.B		Open field test (cumulative time spend in center vs. border of arena)
			Average time in border (s)	SD	Average time in centre (s)	SD	Comparison (Student test)	P value adj.
	Sox9fl/+ Sox1+/+ (n=19)		231.719	8.78408	52.5859	9.01474	Sox9fl/+ Sox1+/+ (n=3) vs. Sox9fl/fl Sox1Cre/+ (n=3) in border	0.2829
	Sox9fl/fl Sox1Cre/+ (n=19)		235.933	14.3777	48.4	14.251	Sox9fl/+ Sox1+/+ (n=3) vs. Sox9fl/fl Sox1Cre/+ (n=3) in centre	0.2864
