# Supplementary material for: Dentate gyrus development requires a cortical hem-derived astrocytic scaffold
Source: eLife. 2021 Jan 4;10:e63904. doi: 10.7554/eLife.63904 (PMC7806271; doi:10.7554/eLife.63904)
Supplement: Figure 1—figure supplement 5—source data 1. [file elife-63904-fig1-figsupp5-data1.xlsx]

## Sheet: Figure S.3 real
	Figure 1 - Figure Supplement 5.B		Sox9 fold change (qPCR RQ) in dorsal telencephalon (DT) and archicortex (ARK) at E12.5
			DT					Statistical analysis
			E12.5			Average	SD	Normality test*	ANOVA	Comparison (Tukey test)	P value adj.
	Sox9fl/+ Sox1+/+ (n=3)		1.08561	1.09847	0.81592	1	0.159547	0.0668	P value: <0.0001 F: 77.71	Sox9fl/+ Sox1+/+ (n=3) vs. Sox9fl/fl Sox1Cre/+ (n=3)	<0.0001
	Sox9fl/fl Sox1Cre/+ (n=3)		0.0168571	0.00177311	0.00141449	0.00668157	0.00881409	0.1577		Sox9fl/+ Sox1+/+ (n=3) vs. Sox9fl/fl Nestin-Cre (n=3)	0.0002
	Sox9fl/fl Nestin-Cre (n=3)		0.297199	0.155987	0.159375	0.204187	0.0805683	0.0561		Sox9fl/fl Sox1Cre/+ (n=3) vs. Sox9fl/fl Nestin-Cre (n=3)	0.125
			ARK (relative to DT)					Statistical analysis
			E12.5			Average	SD	Normality test*	ANOVA	Comparison (Tukey test)	P value adj.
	Sox9fl/+;Sox1+/+ (n=3)		1.39813	1.12	0.881786	1.13331	0.25843	0.9586	P value: 0.0005 F: 35.01	Sox9fl/+ Sox1+/+ (n=3) vs. Sox9fl/fl Sox1Cre/+ (n=3)	0.0005
	Sox9fl/fl;Sox1Cre/+ (n=3)		0.0439041	0.0218155	0.0169744	0.0275647	0.0143559	0.492		Sox9fl/+ Sox1+/+ (n=3) vs. Sox9fl/fl Nestin-Cre (n=3)	0.0017
	Sox9fl/fl;Nestin-Cre (n=3)		0.394064	0.207258	0.102273	0.234532	0.147795	0.9479		Sox9fl/fl Sox1Cre/+ (n=3) vs. Sox9fl/fl Nestin-Cre (n=3)	0.3667
	* Normality test: Shapiro-Wilk test
