# Supplementary material for: Dentate gyrus development requires a cortical hem-derived astrocytic scaffold
Source: eLife. 2021 Jan 4;10:e63904. doi: 10.7554/eLife.63904 (PMC7806271; doi:10.7554/eLife.63904)
Supplement: Figure 1—source data 1. [file elife-63904-fig1-data1.xlsx]

## Sheet: Figure 1
	Fig. 1.B		DG pixel area					Statistical analysis
			3 months old			Average	SD	Normality test*	ANOVA	Comparison (Student test)			P value
	Sox9fl/+;Sox1+/+ (n=3)		54494	51851.8	60608.4	55651.4	4491.57	0.5702	N too small	Sox9fl/+ Sox1+/+ (n=3) vs. Sox9fl/fl Sox1Cre/+ (n=3)			0.0069
	Sox9fl/fl;Sox1Cre/+ (n=3)		39549.8	27759	33966.2	33758.3	5898.15	0.9417		N too small			N too small
	Sox9fl/fl;Nestin-Cre (n=2)		60700.8	65287		62993.9	3242.93	N too small		N too small			N too small
	Fig. 1.C		DG pixel area							Statistical analysis
			P2					Average	SD	Normality test*	ANOVA	Comparison (Tukey test)			P value adj.	Comparison (Student test)			P value adj.
	Sox9fl/+;Sox1+/+ (n=4)		192562	200851	204196	204995		200651	5683.58	0.2418	P value: 0.033 F: 10.70	Sox9fl/+ Sox1+/+ (n=3) vs. Sox9fl/fl Sox1Cre/+ (n=3)			0.0026	Sox9fl/+ Sox1+/+ (n=3) vs. Sox9fl/fl Sox1Cre/+ (n=3)			0.0044
	Sox9fl/fl;Sox1Cre/+ (n=5)		135690	180237	148919	118650	102010	137101	29892.5	0.9539		Sox9fl/+ Sox1+/+ (n=3) vs. Sox9fl/fl Nestin-Cre (n=3)			0.1672	Sox9fl/+ Sox1+/+ (n=3) vs. Sox9fl/fl Nestin-Cre (n=3)			0.0084
	Sox9fl/fl;Nestin-Cre (n=4)		172790	166290	190372	157638		171772	13866.1	0.8027		Sox9fl/fl Sox1Cre/+ (n=3) vs. Sox9fl/fl Nestin-Cre (n=3)			0.0731
	Fig. 1.E							angular transformation
		Sox9fl/+;Sox1+/+ (n=13)			Sox9fl/fl;Sox1Cre/+ (n=11)			Sox9fl/+;Sox1+/+ (n=13)			Sox9fl/fl;Sox1Cre/+ (n=11)
		2nd day		3rd day	2nd day		3rd day	2nd day		3rd day	2nd day		3rd day
		% left object	% right object	% new object	% left object	% right object	% new object	% left object	% right object	% new object	% left object	% right object	% new object
		0.382636	0.617364	0.714286	0.558768	0.441232	0.569893	38.2122	51.7878	57.6885	48.3749	41.6251	49.0177
		0.325802	0.674198	0.855688	0.432558	0.567442	0.783542	34.8054	55.1946	67.6735	41.1241	48.8759	62.2736
		0.629687	0.370313	0.672316	0.509804	0.490196	0.342961	52.5165	37.4835	55.0797	45.5618	44.4382	35.8474
		0.923548	0.0764524	0.774436	0.356466	0.643534	0.521994	73.9486	16.0514	61.6448	36.6587	53.3413	46.2606
		0.0511365	0.948863	0.692623	0.685649	0.314351	0.630705	13.0696	76.9304	56.3295	55.8978	34.1022	52.5769
		0.543379	0.456621	0.632912	0.298387	0.701613	0.828125	47.4886	42.5114	52.708	33.11	56.89	65.5072
		0.478261	0.521739	0.710145	0.496876	0.503124	0.571428	43.7541	46.2459	57.4265	44.821	45.179	49.1066
		0.635803	0.364197	0.56	0.139344	0.860656	0.315508	52.8799	37.1201	48.4461	21.9185	68.0815	34.1735
		0.513972	0.486028	0.660578	0.614925	0.385075	0.666666	45.8007	44.1993	54.3664	51.6441	38.3559	54.7356
		0.487965	0.512035	0.449152	0.223333	0.776667	0.479338	44.3104	45.6896	42.0816	28.202	61.798	43.8158
		0.661392	0.338608	0.434066	0.454545	0.545455	0.184211	54.4157	35.5843	41.2112	42.392	47.608	25.4167
		0.182461	0.817539	0.813953				25.2871	64.7129	64.4479
		0.661364	0.338636	0.811764				54.414	35.586	64.2871
	Average	0.498262	0.501738	0.675532	0.433696	0.566304	0.535852	44.6848	45.3152	55.6454	40.8823	49.1177	47.1574
	SD	0.226536	0.226536	0.131625	0.16654	0.16654	0.197003	14.9989	14.9989	8.14137	10.1776	10.1776	12.0017
							Normality test*	0.6169	0.6169	0.5627	0.9343	0.9343	0.938
							Student test (P value)	% left object vs. % new object		0.0294	% left object vs. % new object		0.2009
								% right object vs. % new object		0.0391	% right object vs. % new object		0.6839
	* Normality test: Shapiro-Wilk test
