# Supplementary material for: Dentate gyrus development requires a cortical hem-derived astrocytic scaffold
Source: eLife. 2021 Jan 4;10:e63904. doi: 10.7554/eLife.63904 (PMC7806271; doi:10.7554/eLife.63904)
Supplement: Figure 2—figure supplement 1—source data 1. [file elife-63904-fig2-figsupp1-data1.xlsx]

## Sheet: Figure S.4 real
	Figure 2 - Figure Supplement 1.B		Total number of TBR2+ cells at E14.5
			TBR2+ cells					Statistical analysis
			E14.5			Average	SD	Normality test*	ANOVA	Comparison (Student test)	P value
	Sox9fl/+;Sox1+/+ (n=3)		144.2	117.2	119.8	127.067	14.8947	0.1669	N/A	Sox9fl/+ Sox1+/+ (n=3) vs. Sox9fl/fl Sox1Cre/+ (n=3)	0.4955
	Sox9fl/fl;Sox1Cre/+ (n=3)		162.8	118.8	134.4	138.667	22.3081	0.6822
	Figure 2 - Figure Supplement 1.C		Total number of PROX1+ cells at E16.5
			PROX1+ cells					Statistical analysis
			E16.5			Average	SD	Normality test*	ANOVA	Comparison (Student test)	P value
	Sox9fl/+;Sox1+/+ (n=3)		509	602	587	566	49.93	0.288	N/A	Sox9fl/+ Sox1+/+ (n=3) vs. Sox9fl/fl Sox1Cre/+ (n=3)	0.7009
	Sox9fl/fl;Sox1Cre/+ (n=3)		632	575	396	534.333	123.144	0.4461
	* Normality test: Shapiro-Wilk test
