# Supplementary material for: Dentate gyrus development requires a cortical hem-derived astrocytic scaffold
Source: eLife. 2021 Jan 4;10:e63904. doi: 10.7554/eLife.63904 (PMC7806271; doi:10.7554/eLife.63904)
Supplement: Figure 2—figure supplement 2—source data 1. [file elife-63904-fig2-figsupp2-data1.xlsx]

## Sheet: Figure S.5
	Figure 2 - Figure Supplement 2.B		Cleaved caspase+ cells at P2 in the 1ry and 2ry matrix
			1ry and 2ry matrix					Statistical analysis
			P2			Average	SD	Normality test*	ANOVA	Comparison (Student test)	P value adj.
	Sox9fl/+ Sox1+/+ (n=3)		26.25	17	25.6	22.95	5.16309	0.1203	N/A	Sox9fl/+ Sox1+/+ (n=3) vs. Sox9fl/fl Sox1Cre/+ (n=3)	0.7774
	Sox9fl/fl Sox1Cre/+ (n=3)		22.3333	24	25.3333	23.8889	1.50308	0.8776
	* Normality test: Shapiro-Wilk test
