# Supplementary material for: Dentate gyrus development requires a cortical hem-derived astrocytic scaffold
Source: eLife. 2021 Jan 4;10:e63904. doi: 10.7554/eLife.63904 (PMC7806271; doi:10.7554/eLife.63904)
Supplement: Figure 2—source data 1. [file elife-63904-fig2-data1.xlsx]

## Sheet: Figure 2.G,J
	Fig. 2.E	Total number of PAX6+ cells at E14.5 and E16.5
			PAX6+ cells					Statistical analysis
			E14.5			Average	SD	Normality test*	ANOVA	Comparison (Student test)	P value
	Sox9fl/+;Sox1+/+ (n=3)		325	333.4	428.2	362.2	57.3118	0.1401	N/A	Sox9fl/+ Sox1+/+ (n=3) vs. Sox9fl/fl Sox1Cre/+ (n=3)	0.9266
	Sox9fl/fl;Sox1Cre/+ (n=3)		337.8	374.2	385.2	365.733	24.8083	0.427
			PAX6+ cells					Statistical analysis
			E16.5			Average	SD	Normality test*	ANOVA	Comparison (Tukey test)	P value adj.
	Sox9fl/+;Sox1+/+ (n=3)		636.6	653.6	631	640.4	11.7695	0.4588	N/A	Sox9fl/+ Sox1+/+ (n=3) vs. Sox9fl/fl Sox1Cre/+ (n=3)	0.5778
	Sox9fl/fl;Sox1Cre/+ (n=3)		784.8	566.8	684.6	678.733	109.118	0.911
	Fig. 2.G	Total number of TBR2+ cells at E18.5 and P2
			TBR2+ cells					Statistical analysis
			E18.5			Average	SD	Normality test*	ANOVA ***	Comparison (Tukey test)	P value adj.
	Sox9fl/+;Sox1+/+ (n=3)		2069	1977	1956	2000.67	60.1027	0.3354	P value: 0.105 F: 3.359	Sox9fl/+ Sox1+/+ (n=3) vs. Sox9fl/fl Sox1Cre/+ (n=3)	0.8788
	Sox9fl/fl;Sox1Cre/+ (n=3)		2109	1502	2122	1911	354.264	0.035		Sox9fl/+ Sox1+/+ (n=3) vs. Sox9fl/fl Nestin-Cre (n=3)	0.2031
	Sox9fl/fl;Nestin-Cre (n=3)		2511	2353	2215	2359.67	148.113	0.9255		Sox9fl/fl Sox1Cre/+ (n=3) vs. Sox9fl/fl Nestin-Cre (n=3)	0.109
			TBR2+ cells						Statistical analysis
			P2				Average	SD	Normality test*	ANOVA ***	Comparison (Tukey test)	P value adj.
	Sox9fl/+;Sox1+/+ (n=3)		2409	2979	2988		2792	331.718	0.0259	P value: 0.014 F: 7.622	Sox9fl/+ Sox1+/+ (n=3) vs. Sox9fl/fl Sox1Cre/+ (n=3)	0.0119
	Sox9fl/fl;Sox1Cre/+ (n=3)		2220	2237	1668	1956.25	2020.31	267.742	0.3368		Sox9fl/+ Sox1+/+ (n=3) vs. Sox9fl/fl Nestin-Cre (n=3)	0.0622
	Sox9fl/fl;Nestin-Cre (n=3)		2246	2488	2255	2010	2249.75	195.179	0.7345		Sox9fl/fl Sox1Cre/+ (n=3) vs. Sox9fl/fl Nestin-Cre (n=3)	0.4656
					% of TBR2+ cells loss vs CTRL
			Sox9fl/fl;Sox1Cre/+ (n=3)		0.276392
			Sox9fl/fl;Nestin-Cre (n=3)		0.194216
	Fig. 2.J	Total number of PROX1+ cells at E18.5 and P2
			PROX1+ cells					Statistical analysis
			E18.5			Average	SD	Normality test*	ANOVA ***	Comparison (Tukey test)	P value
	Sox9fl/+;Sox1+/+ (n=3)		2044	2407	2740	2397	348.108	0.9525	P value: 0.3691 F: 1.182	Sox9fl/+ Sox1+/+ (n=3) vs. Sox9fl/fl Sox1Cre/+ (n=3)	0.4784
	Sox9fl/fl;Sox1Cre/+ (n=3)		1943	2156	2153	2084	122.119	0.0235		Sox9fl/+ Sox1+/+ (n=3) vs. Sox9fl/fl Nestin-Cre (n=3)	0.3933
	Sox9fl/fl;Nestin-Cre (n=3)		1939	2471	1706	2038.67	392.118	0.5761		Sox9fl/fl Sox1Cre/+ (n=3) vs. Sox9fl/fl Nestin-Cre (n=3)	0.9826
			PROX1+ cells						Statistical analysis
			P2				Average	SD	Normality test*	ANOVA	Comparison (Tukey test)	P value
	Sox9fl/+;Sox1+/+ (n=3)		3055	2475	3156		2895.33	367.506	0.2633	P value: 0.0818 F: 3.48	Sox9fl/+ Sox1+/+ (n=3) vs. Sox9fl/fl Sox1Cre/+ (n=3)	0.0694
	Sox9fl/fl;Sox1Cre/+ (n=3)		2239	1798	2433	2432	2225.5	299.242	0.1366		Sox9fl/+ Sox1+/+ (n=3) vs. Sox9fl/fl Nestin-Cre (n=3)	0.3842
	Sox9fl/fl;Nestin-Cre (n=3)		2408	2544	2200	3003	2538.75	340.295	0.7163		Sox9fl/fl Sox1Cre/+ (n=3) vs. Sox9fl/fl Nestin-Cre (n=3)	0.4185
					% of PROX1+ cells loss vs CTRL
			Sox9fl/fl;Sox1Cre/+ (n=3)		0.231349
			Sox9fl/fl;Nestin-Cre (n=3)		0.123158
	Fig. 2.L
			PAX6+ cells - Matrix 1					Statistical analysis
			E14.5			Average	SD	Normality test*	ANOVA	Comparison (Student test)	P value
	Sox9fl/+;Sox1+/+ (n=3)		108.6	116.2	210.6	145.133	56.823	0.1278	N/A	Sox9fl/+ Sox1+/+ (n=3) vs. Sox9fl/fl Sox1Cre/+ (n=3)	0.9512
	Sox9fl/fl;Sox1Cre/+ (n=3)		117.4	133.4	192.4	147.733	39.5011	0.3895
			PAX6+ cells - Matrix 2					Statistical analysis
			E14.5			Average	SD	Normality test*	ANOVA	Comparison (Student test)	P value
	Sox9fl/+;Sox1+/+ (n=3)		61.8	74.6	84.2	73.5333	11.238	0.8428	N/A	Sox9fl/+ Sox1+/+ (n=3) vs. Sox9fl/fl Sox1Cre/+ (n=3)	0.8254
	Sox9fl/fl;Sox1Cre/+ (n=3)		85	70.6	57.8	71.1333	13.6078	0.9352
			PAX6+ cells - Matrix 1					Statistical analysis
			E16.5			Average	SD	Normality test*	ANOVA	Comparison (Student test)	P value adj.
	Sox9fl/+;Sox1+/+ (n=3)		109	135.4	207	150.467	50.7075	0.503	N/A	Sox9fl/+ Sox1+/+ (n=3) vs. Sox9fl/fl Sox1Cre/+ (n=3)	0.8674
	Sox9fl/fl;Sox1Cre/+ (n=3)		114	131.2	231.2	158.8	63.2873	0.2603
			PAX6+ cells - Matrix 2					Statistical analysis
			E16.5			Average	SD	Normality test*	ANOVA	Comparison (Student test)	P value adj.
	Sox9fl/+;Sox1+/+ (n=3)		208.6	203	230.6	214.067	14.5895	0.3688	N/A	Sox9fl/+ Sox1+/+ (n=3) vs. Sox9fl/fl Sox1Cre/+ (n=3)	0.9136
	Sox9fl/fl;Sox1Cre/+ (n=3)		275.2	144.4	209.2	209.6	65.4009	0.9899
	Fig. 2.Mi	Distribution of TBR2+ cells along primary, secondary and tertiary matrices at E18.5
			TBR2+ cells - Matrix 1					Statistical analysis
			E18.5			Average	SD	Normality test*	ANOVA	Comparison (Tukey test)	P value adj.
	Sox9fl/+;Sox1+/+ (n=3)		83.2	86.2	93.2	87.5333	5.1316	0.5665	P value: 0.3845 F: 1.126	Sox9fl/+ Sox1+/+ (n=3) vs. Sox9fl/fl Sox1Cre/+ (n=3)	0.5022
	Sox9fl/fl;Sox1Cre/+ (n=3)		125.4	80.6	117.8	107.933	23.9744	0.304		Sox9fl/+ Sox1+/+ (n=3) vs. Sox9fl/fl Nestin-Cre (n=3)	0.4038
	Sox9fl/fl;Nestin-Cre (n=3)		141.2	88.6	104.4	111.4	26.9896	0.5673		Sox9fl/fl Sox1Cre/+ (n=3) vs. Sox9fl/fl Nestin-Cre (n=3)	0.9779
			TBR2+ cells - Matrix 2					Statistical analysis
			E18.5			Average	SD	Normality test*	ANOVA	Comparison (Tukey test)	P value adj.
	Sox9fl/+;Sox1+/+ (n=3)		178	181	181.2	180.067	1.79258	0.1066	P value: 0.0090 F: 11.41	Sox9fl/+ Sox1+/+ (n=3) vs. Sox9fl/fl Sox1Cre/+ (n=3)	0.4406
	Sox9fl/fl;Sox1Cre/+ (n=3)		228	161.4	232.6	207.333	39.8459	0.1103		Sox9fl/+ Sox1+/+ (n=3) vs. Sox9fl/fl Nestin-Cre (n=3)	0.0085
	Sox9fl/fl;Nestin-Cre (n=3)		268.4	298.2	263	276.533	18.9571	0.2729		Sox9fl/fl Sox1Cre/+ (n=3) vs. Sox9fl/fl Nestin-Cre (n=3)	0.0366
			TBR2+ cells - Matrix 3					Statistical analysis
			E18.5			Average	SD	Normality test*	ANOVA	Comparison (Tukey test)	P value adj.
	Sox9fl/+;Sox1+/+ (n=3)		152.6	128.2	116.8	132.533	18.2892	0.6053	P value: 0.0017 F: 22.22	Sox9fl/+ Sox1+/+ (n=3) vs. Sox9fl/fl Sox1Cre/+ (n=3)	0.0016
	Sox9fl/fl;Sox1Cre/+ (n=3)		68.4	58.4	74	66.9333	7.90274	0.6917		Sox9fl/+ Sox1+/+ (n=3) vs. Sox9fl/fl Nestin-Cre (n=3)	0.0075
	Sox9fl/fl;Nestin-Cre (n=3)		92.6	83.8	75.6	84	8.50176	0.9611		Sox9fl/fl Sox1Cre/+ (n=3) vs. Sox9fl/fl Nestin-Cre (n=3)	0.29
	Fig. 2.Mii	Distribution of TBR2+ cells along primary, secondary and tertiary matrices at P2
			TBR2+ cells - Matrix 1					Statistical analysis
			P2			Average	SD	Normality test*	ANOVA	Comparison (Tukey test)	P value adj.
	Sox9fl/+;Sox1+/+ (n=3)		28.8	33	47.6	36.4667	9.86779	0.4096	P value: 0.0106 F: 10.67	Sox9fl/+ Sox1+/+ (n=3) vs. Sox9fl/fl Sox1Cre/+ (n=3)	0.0101
	Sox9fl/fl;Sox1Cre/+ (n=3)		95.6	67.2	75.6	79.4667	14.5895	0.5577		Sox9fl/+ Sox1+/+ (n=3) vs. Sox9fl/fl Nestin-Cre (n=3)	0.4895
	Sox9fl/fl;Nestin-Cre (n=3)		53.6	54.6	36.2	48.1333	10.3467	0.0923		Sox9fl/fl Sox1Cre/+ (n=3) vs. Sox9fl/fl Nestin-Cre (n=3)	0.0399
			TBR2+ cells - Matrix 2					Statistical analysis
			P2			Average	SD	Normality test*	ANOVA	Comparison (Tukey test)	P value adj.
	Sox9fl/+;Sox1+/+ (n=3)		135.4	130.2	163.4	143	17.8572	0.2791	P value: 0.0183 F: 8.394	Sox9fl/+ Sox1+/+ (n=3) vs. Sox9fl/fl Sox1Cre/+ (n=3)	0.5668
	Sox9fl/fl;Sox1Cre/+ (n=3)		106.6	151.8	125.2	127.867	22.7177	0.8055		Sox9fl/+ Sox1+/+ (n=3) vs. Sox9fl/fl Nestin-Cre (n=3)	0.0621
	Sox9fl/fl;Nestin-Cre (n=3)		181.2	177.4	193.6	184.067	8.47191	0.432		Sox9fl/fl Sox1Cre/+ (n=3) vs. Sox9fl/fl Nestin-Cre (n=3)	0.0175
			TBR2+ cells - Matrix 3					Statistical analysis
			P2			Average	SD	Normality test*	ANOVA	Comparison (Tukey test)	P value adj.
	Sox9fl/+;Sox1+/+ (n=3)		317.6	432.6	386.6	378.933	57.8821	0.7804	P value: 0.0109 F: 10.54	Sox9fl/+ Sox1+/+ (n=3) vs. Sox9fl/fl Sox1Cre/+ (n=3)	0.0119
	Sox9fl/fl;Sox1Cre/+ (n=3)		241.8	228.4	132.8	201	59.4417	0.2157		Sox9fl/+ Sox1+/+ (n=3) vs. Sox9fl/fl Nestin-Cre (n=3)	0.029
	Sox9fl/fl;Nestin-Cre (n=3)		214.4	265.6	221.2	233.733	27.806	0.2341		Sox9fl/fl Sox1Cre/+ (n=3) vs. Sox9fl/fl Nestin-Cre (n=3)	0.7203
	Fig. 2.Miii	Distribution of PROX1+ cells along primary, secondary and tertiary matrices at P2
			PROX1+ cells - Matrix 1					Statistical analysis
			P2			Average	SD	Normality test*	ANOVA	Comparison (Tukey test)	P value adj.
	Sox9fl/+;Sox1+/+ (n=3)		34	9	10	17.6667	14.1539	0.0675	P value: 0.0100 F: 10.93	Sox9fl/+ Sox1+/+ (n=3) vs. Sox9fl/fl Sox1Cre/+ (n=3)	0.0088
	Sox9fl/fl;Sox1Cre/+ (n=3)		97	80	156	111	39.8873	0.4101		Sox9fl/+ Sox1+/+ (n=3) vs. Sox9fl/fl Nestin-Cre (n=3)	0.052
	Sox9fl/fl;Nestin-Cre (n=3)		87	71	80	79.3333	8.02081	0.8624		Sox9fl/fl Sox1Cre/+ (n=3) vs. Sox9fl/fl Nestin-Cre (n=3)	0.3315
			PROX1+ cells - Matrix 2					Statistical analysis
			P2			Average	SD	Normality test*	Kruskal-Wallis test ****	Comparison (Dunn test)	P value adj.
	Sox9fl/+;Sox1+/+ (n=3)		158	43	157	119.333	66.1085	0.0144	P value: 0.0714	Sox9fl/+ Sox1+/+ (n=3) vs. Sox9fl/fl Sox1Cre/+ (n=3)	0.1579
	Sox9fl/fl;Sox1Cre/+ (n=3)		265	231	281	259	25.5343	0.6086		Sox9fl/+ Sox1+/+ (n=3) vs. Sox9fl/fl Nestin-Cre (n=3)	0.1107
	Sox9fl/fl;Nestin-Cre (n=3)		263	261	416	313.333	88.9176	0.0215		Sox9fl/fl Sox1Cre/+ (n=3) vs. Sox9fl/fl Nestin-Cre (n=3)	>0.9999
			PROX1+ cells - Matrix 3					Statistical analysis
			P2			Average	SD	Normality test*	ANOVA	Comparison (Tukey test)	P value adj.
	Sox9fl/+;Sox1+/+ (n=3)		2863	2423	2989	2758.33	297.162	0.408	P value: 0.0112 F: 10.4	Sox9fl/+ Sox1+/+ (n=3) vs. Sox9fl/fl Sox1Cre/+ (n=3)	0.0117
	Sox9fl/fl;Sox1Cre/+ (n=3)		1877	1487	1996	1786.67	266.252	0.4304		Sox9fl/+ Sox1+/+ (n=3) vs. Sox9fl/fl Nestin-Cre (n=3)	0.0329
	Sox9fl/fl;Nestin-Cre (n=3)		2058	2212	1704	1991.33	260.479	0.5731		Sox9fl/fl Sox1Cre/+ (n=3) vs. Sox9fl/fl Nestin-Cre (n=3)	0.6536
	Fig. 2.N	Distribution of PROX1+ granule neurons within the forming DG (Bins 1-10) at E18.5
			% of PROX1+ cells per bin
			E18.5			Average	SD
Bin#1	Sox9fl/+;Sox1+/+ (n=3)		0.017	0.038	0.039	0.0313333	0.0124231
	Sox9fl/fl;Sox1Cre/+ (n=3)		0.034	0.068	0.046	0.0493333	0.0172434
	Sox9fl/fl;Nestin-Cre (n=3)		0.042	0.073	0.023	0.046	0.0252389
Bin#2	Sox9fl/+;Sox1+/+ (n=3)		0.125	0.15	0.132	0.135667	0.012897
	Sox9fl/fl;Sox1Cre/+ (n=3)		0.159	0.204	0.189	0.184	0.0229129
	Sox9fl/fl;Nestin-Cre (n=3)		0.167	0.216	0.128	0.170333	0.0440946
Bin#3	Sox9fl/+;Sox1+/+ (n=3)		0.158	0.136	0.123	0.139	0.0176918
	Sox9fl/fl;Sox1Cre/+ (n=3)		0.174	0.161	0.172	0.169	0.007
	Sox9fl/fl;Nestin-Cre (n=3)		0.156	0.182	0.151	0.163	0.0166433
Bin#4	Sox9fl/+;Sox1+/+ (n=3)		0.14	0.131	0.114	0.128333	0.0132035
	Sox9fl/fl;Sox1Cre/+ (n=3)		0.14	0.115	0.14	0.131667	0.0144338
	Sox9fl/fl;Nestin-Cre (n=3)		0.118	0.126	0.121	0.121667	0.00404145
Bin#5	Sox9fl/+;Sox1+/+ (n=3)		0.098	0.112	0.107	0.105667	0.0070946
	Sox9fl/fl;Sox1Cre/+ (n=3)		0.107	0.098	0.099	0.101333	0.00493288
	Sox9fl/fl;Nestin-Cre (n=3)		0.097	0.087	0.116	0.1	0.0147309
Bin#6	Sox9fl/+;Sox1+/+ (n=3)		0.094	0.11	0.1	0.101333	0.0080829
	Sox9fl/fl;Sox1Cre/+ (n=3)		0.1	0.083	0.092	0.0916667	0.0085049
	Sox9fl/fl;Nestin-Cre (n=3)		0.091	0.066	0.112	0.0896667	0.023029
Bin#7	Sox9fl/+;Sox1+/+ (n=3)		0.112	0.121	0.105	0.112667	0.00802081
	Sox9fl/fl;Sox1Cre/+ (n=3)		0.087	0.092	0.081	0.0866667	0.00550757
	Sox9fl/fl;Nestin-Cre (n=3)		0.089	0.069	0.11	0.0893333	0.020502
Bin#8	Sox9fl/+;Sox1+/+ (n=3)		0.137	0.126	0.131	0.131333	0.00550757
	Sox9fl/fl;Sox1Cre/+ (n=3)		0.089	0.079	0.089	0.0856667	0.0057735
	Sox9fl/fl;Nestin-Cre (n=3)		0.113	0.075	0.129	0.105667	0.0277369
Bin#9	Sox9fl/+;Sox1+/+ (n=3)		0.093	0.058	0.112	0.0876667	0.0273922
	Sox9fl/fl;Sox1Cre/+ (n=3)		0.072	0.074	0.07	0.072	0.002
	Sox9fl/fl;Nestin-Cre (n=3)		0.1	0.07	0.079	0.083	0.0153948
Bin#10	Sox9fl/+;Sox1+/+ (n=3)		0.025	0.019	0.038	0.0273333	0.00971253
	Sox9fl/fl;Sox1Cre/+ (n=3)		0.036	0.027	0.022	0.0283333	0.0070946
	Sox9fl/fl;Nestin-Cre (n=3)		0.027	0.036	0.03	0.031	0.00458258
	Angular trasformation of previous data (because it is a percentage) on which the statistical analysis is performed
			Angular transformation					Statistical analysis
			E18.5			Average	SD	Normality test*	Two-way ANOVA	Comparison (Tukey test)	P value adj.
Bin#1	Sox9fl/+;Sox1+/+ (n=3)		0	11.241	11.3899	N/A	N/A	0.0855	P value: Interaction = 0.0387; Row Factor <0.0001; Column Factor = 0.9991	Sox9fl/+ Sox1+/+ (n=3) vs. Sox9fl/fl Sox1Cre/+ (n=3)	0.1244	Bin#1
	Sox9fl/fl;Sox1Cre/+ (n=3)		10.6256	15.1156	12.3848	N/A	N/A	0.7384		Sox9fl/+ Sox1+/+ (n=3) vs. Sox9fl/fl Nestin-Cre (n=3)	0.2858
	Sox9fl/fl;Nestin-Cre (n=3)		11.8259	15.6753	8.72299	N/A	N/A	0.8682		Sox9fl/fl Sox1Cre/+ (n=3) vs. Sox9fl/fl Nestin-Cre (n=3)	0.8904
Bin#2	Sox9fl/+;Sox1+/+ (n=3)		20.7048	22.7865	21.3041	N/A	N/A	0.497		Sox9fl/+ Sox1+/+ (n=3) vs. Sox9fl/fl Sox1Cre/+ (n=3)	0.0187	Bin#2
	Sox9fl/fl;Sox1Cre/+ (n=3)		23.4999	26.8505	25.7688	N/A	N/A	0.591		Sox9fl/+ Sox1+/+ (n=3) vs. Sox9fl/fl Nestin-Cre (n=3)	0.1269
	Sox9fl/fl;Nestin-Cre (n=3)		24.1205	27.6946	20.9634	N/A	N/A	0.9344		Sox9fl/fl Sox1Cre/+ (n=3) vs. Sox9fl/fl Nestin-Cre (n=3)	0.6911
Bin#3	Sox9fl/+;Sox1+/+ (n=3)		23.4215	21.6405	20.531	N/A	N/A	0.748		Sox9fl/+ Sox1+/+ (n=3) vs. Sox9fl/fl Sox1Cre/+ (n=3)	0.1825	Bin#3
	Sox9fl/fl;Sox1Cre/+ (n=3)		24.6537	23.6562	24.5022	N/A	N/A	0.2336		Sox9fl/+ Sox1+/+ (n=3) vs. Sox9fl/fl Nestin-Cre (n=3)	0.3251
	Sox9fl/fl;Nestin-Cre (n=3)		23.264	25.2529	22.8666	N/A	N/A	0.3176		Sox9fl/fl Sox1Cre/+ (n=3) vs. Sox9fl/fl Nestin-Cre (n=3)	0.9372
Bin#4	Sox9fl/+;Sox1+/+ (n=3)		21.9728	21.2193	19.7331	N/A	N/A	0.6648		Sox9fl/+ Sox1+/+ (n=3) vs. Sox9fl/fl Sox1Cre/+ (n=3)	0.9737	Bin#4
	Sox9fl/fl;Sox1Cre/+ (n=3)		21.9728	19.8231	21.9728	N/A	N/A	0.0531		Sox9fl/+ Sox1+/+ (n=3) vs. Sox9fl/fl Nestin-Cre (n=3)	0.9111
	Sox9fl/fl;Nestin-Cre (n=3)		20.0909	20.7913	20.3559	N/A	N/A	0.959		Sox9fl/fl Sox1Cre/+ (n=3) vs. Sox9fl/fl Nestin-Cre (n=3)	0.8037
Bin#5	Sox9fl/+;Sox1+/+ (n=3)		18.2431	19.5521	19.0934	N/A	N/A	0.5818		Sox9fl/+ Sox1+/+ (n=3) vs. Sox9fl/fl Sox1Cre/+ (n=3)	0.952	Bin#5
	Sox9fl/fl;Sox1Cre/+ (n=3)		19.0934	18.2431	18.3392	N/A	N/A	0.1606		Sox9fl/+ Sox1+/+ (n=3) vs. Sox9fl/fl Nestin-Cre (n=3)	0.9016
	Sox9fl/fl;Nestin-Cre (n=3)		18.1465	17.155	19.9127	N/A	N/A	0.685		Sox9fl/fl Sox1Cre/+ (n=3) vs. Sox9fl/fl Nestin-Cre (n=3)	0.99
Bin#6	Sox9fl/+;Sox1+/+ (n=3)		17.8541	19.3697	18.4349	N/A	N/A	0.6677		Sox9fl/+ Sox1+/+ (n=3) vs. Sox9fl/fl Sox1Cre/+ (n=3)	0.7769	Bin#6
	Sox9fl/fl;Sox1Cre/+ (n=3)		18.4349	16.7441	17.6568	N/A	N/A	0.9967		Sox9fl/+ Sox1+/+ (n=3) vs. Sox9fl/fl Nestin-Cre (n=3)	0.6578
	Sox9fl/fl;Nestin-Cre (n=3)		17.5575	14.8865	19.5521	N/A	N/A	0.8311		Sox9fl/fl Sox1Cre/+ (n=3) vs. Sox9fl/fl Nestin-Cre (n=3)	0.9789
Bin#7	Sox9fl/+;Sox1+/+ (n=3)		19.5521	20.3559	18.9072	N/A	N/A	0.8831		Sox9fl/+ Sox1+/+ (n=3) vs. Sox9fl/fl Sox1Cre/+ (n=3)	0.1675	Bin#7
	Sox9fl/fl;Sox1Cre/+ (n=3)		17.155	17.6568	16.5352	N/A	N/A	0.8276		Sox9fl/+ Sox1+/+ (n=3) vs. Sox9fl/fl Nestin-Cre (n=3)	0.2251
	Sox9fl/fl;Nestin-Cre (n=3)		17.3572	15.2291	19.3697	N/A	N/A	0.9904		Sox9fl/fl Sox1Cre/+ (n=3) vs. Sox9fl/fl Nestin-Cre (n=3)	0.9854
Bin#8	Sox9fl/+;Sox1+/+ (n=3)		21.724	20.7913	21.2193	N/A	N/A	0.816		Sox9fl/+ Sox1+/+ (n=3) vs. Sox9fl/fl Sox1Cre/+ (n=3)	0.0071	Bin#8
	Sox9fl/fl;Sox1Cre/+ (n=3)		17.3572	16.324	17.3572	N/A	N/A	0.0756		Sox9fl/+ Sox1+/+ (n=3) vs. Sox9fl/fl Nestin-Cre (n=3)	0.1868
	Sox9fl/fl;Nestin-Cre (n=3)		19.6428	15.8942	21.049	N/A	N/A	0.5108		Sox9fl/fl Sox1Cre/+ (n=3) vs. Sox9fl/fl Nestin-Cre (n=3)	0.3602
Bin#9	Sox9fl/+;Sox1+/+ (n=3)		17.7557	13.9356	19.5521	N/A	N/A	0.5907		Sox9fl/+ Sox1+/+ (n=3) vs. Sox9fl/fl Sox1Cre/+ (n=3)	0.503	Bin#9
	Sox9fl/fl;Sox1Cre/+ (n=3)		15.5648	15.7851	15.3417	N/A	N/A	0.7627		Sox9fl/+ Sox1+/+ (n=3) vs. Sox9fl/fl Nestin-Cre (n=3)	0.9489
	Sox9fl/fl;Nestin-Cre (n=3)		18.4349	15.3417	16.324	N/A	N/A	0.6172		Sox9fl/fl Sox1Cre/+ (n=3) vs. Sox9fl/fl Nestin-Cre (n=3)	0.6948
Bin#10	Sox9fl/+;Sox1+/+ (n=3)		9.09744	7.9229	11.241	N/A	N/A	0.7061		Sox9fl/+ Sox1+/+ (n=3) vs. Sox9fl/fl Sox1Cre/+ (n=3)	0.9805	Bin#10
	Sox9fl/fl;Sox1Cre/+ (n=3)		10.9374	9.45755	8.52981	N/A	N/A	0.7037		Sox9fl/+ Sox1+/+ (n=3) vs. Sox9fl/fl Nestin-Cre (n=3)	0.8481
	Sox9fl/fl;Nestin-Cre (n=3)		9.45755	10.9374	9.97422	N/A	N/A	0.5958		Sox9fl/fl Sox1Cre/+ (n=3) vs. Sox9fl/fl Nestin-Cre (n=3)	0.9316
	* Normality test: Shapiro-Wilk test
	*** Non-parametrical statistical analysis is used only when most of the sample groups within one analysis are not normally distributed (e.g. 2 out or 3 samples, or 1 out of 2 samples).
	**** Kruskal-Wallis test and Dunn's test are performed instead of ANOVA and Tukey's test when majority of samples in the analysis are not distributed normally (e.g. 2 out or 3 samples, or 1 out of 2 samples).
