# Supplementary material for: Dentate gyrus development requires a cortical hem-derived astrocytic scaffold
Source: eLife. 2021 Jan 4;10:e63904. doi: 10.7554/eLife.63904 (PMC7806271; doi:10.7554/eLife.63904)
Supplement: Figure 3—source data 1. [file elife-63904-fig3-data1.xlsx]

## Sheet: Figure 3
	Fig. 3.Ei	Analysis of ectopic matrix size (TBR2+ cells)
			%TBR2+ cells in 1/2 matrix / TBR2+ cells in 2ry matrix					Angular transformation **			Statistical analysis
			E18.5 and P2			Average	SD	E18.5 and P2			Normality test*	ANOVA	Comparison (Student test)	P value
	E18.5 Sox9fl/fl;Sox1Cre/+ (n=3)		0.314	0.3532	0.356	0.341067	0.0234822	34.0805	36.4632	36.6309	0.1131	N/A	E18.5 Sox9fl/fl Sox1Cre/+ (n=3) vs. Sox9fl/fl Nestin-Cre (n=3)	0.0654
	E18.5 Sox9fl/fl;Nestin-Cre (n=3)		0.3159	0.2824	0.254	0.2841	0.030985	34.1977	32.101	30.2639	0.9253		P2 Sox9fl/fl Sox1Cre/+ (n=3) vs. Sox9fl/fl Nestin-Cre (n=3)	0.0061
	P2 Sox9fl/fl;Sox1Cre/+ (n=3)		0.4221	0.3636	0.3163	0.367333	0.0529987	40.5184	37.0845	34.2223	0.9004		E18.5 Sox9fl/fl Nestin-Cre (n=3) vs. P2 Sox9fl/fl Nestin-Cre (n=3)	0.0172
	P2 Sox9fl/fl;Nestin-Cre (n=3)		0.2174	0.1657	0.1529	0.178667	0.0341491	27.7919	24.0204	23.0182	0.3836
	Fig. 3.Eii	Analysis of ectopic matrix size (TBR2+EdU+ cells)
			%TBR2+EdU+ cells in 1/2 matrix / TBR2+EdU+ cells in 2ry matrix					Angular transformation **			Statistical analysis
			P2			Average	SD	P2			Normality test*	ANOVA	Comparison (Student test)	P value
	P2 Sox9fl/fl;Sox1Cre/+ (n=3)		0.4579	0.4225	0.3234	0.401267	0.0697187	42.585	40.5416	34.6584	0.4789	N/A	P2 Sox9fl/fl Sox1Cre/+ (n=3) vs. Sox9fl/fl Nestin-Cre (n=3)	0.0084
	P2 Sox9fl/fl;Nestin-Cre (n=3)		0.2292	0.1748	0.1629	0.188967	0.0353475	28.6037	24.7141	23.804	0.3419
	Fig. 3.H	Analysis of electroporated dsRed+ cells after IUE
			n. of dsRed+ cells							Statistical analysis
			P2					Average	SD	Normality test*	ANOVA	Comparison (Student test)			P value
	Sox9fl/+;Sox1+/+ (n=5)		253	635	747	856	426	583.4	243.761	0.8242	N/A	Sox9fl/+ Sox1+/+ (n=3) vs. Sox9fl/fl Sox1Cre/+ (n=3)			0.0045
	Sox9fl/fl;Sox1Cre/+ (n=5)		159	132	148	121	208	153.6	33.7239	0.4675
	Fig. 3.I	Analysis of differentiation of electroporated dsRed+ cells after IUE
			%PROX1+dsRed+ / dsRed+ cells							Angular transformation **					Statistical analysis
			P2					Average	SD	P2					Normality test*	ANOVA	Comparison (Student test)	P value
	Sox9fl/+;Sox1+/+ (n=5)		0.44	0.38	0.28	0.28	0.29	0.334	0.0726636	41.5539	38.0567	31.9481	31.9481	32.5827	0.0908	N/A	Sox9fl/+ Sox1+/+ (n=3) vs. Sox9fl/fl Sox1Cre/+ (n=3)	0.0531
	Sox9fl/fl;Sox1Cre/+ (n=5)		0.38	0.25	0.13	0.02	0.04	0.164	0.151096	38.0567	30	21.1343	8.1301	11.537	0.5342
	Fig. 3.J	Analysis of dsRed+ cells distribution in 1ry, 2ry and 3ry matrix
			% dsRed+ cells in Matrix 1							Angular transformation **					Statistical analysis
			P2					Average	SD	P2					Normality test*	ANOVA	Comparison (Student test)	P value adj.
	Sox9fl/+;Sox1+/+ (n=5)		0.0316	0.126	0.2048	0.1986	0.1549	0.14318	0.0702691	10.2395	20.7913	26.9073	26.4647	23.177	0.171	N/A	Sox9fl/+ Sox1+/+ (n=3) vs. Sox9fl/fl Sox1Cre/+ (n=3)	0.0105
	Sox9fl/fl;Sox1Cre/+ (n=5)		0.1887	0.3712	0.3176	0.3719	0.3173	0.31334	0.0747429	25.7469	37.5361	34.3024	37.5776	34.2839	0.0804
			% dsRed+ cells in Matrix 2							Angular transformation **					Statistical analysis
			P2					Average	SD	P2					Normality test*	ANOVA	Comparison (Student test)	P value adj.
	Sox9fl/+;Sox1+/+ (n=5)		0.2253	0.3307	0.3882	0.4077	0.3685	0.34408	0.0722463	28.3371	35.1042	38.5397	39.6811	37.3759	0.1504	N/A	Sox9fl/+ Sox1+/+ (n=3) vs. Sox9fl/fl Sox1Cre/+ (n=3)	0.5332
	Sox9fl/fl;Sox1Cre/+ (n=5)		0.4528	0.2576	0.5473	0.2397	0.4615	0.39178	0.135926	42.2916	30.5003	47.7141	29.3137	42.7919	0.2019
			% dsRed+ cells in Matrix 3							Angular transformation **					Statistical analysis
			P2					Average	SD	P2					Normality test*	ANOVA	Comparison (Student test)	P value adj.
	Sox9fl/+;Sox1+/+ (n=5)		0.7431	0.5433	0.407	0.3937	0.4765	0.51272	0.142007	59.5456	47.484	39.6403	38.8626	43.6531	0.2508	N/A	Sox9fl/+ Sox1+/+ (n=3) vs. Sox9fl/fl Sox1Cre/+ (n=3)	0.0287
	Sox9fl/fl;Sox1Cre/+ (n=5)		0.3585	0.3712	0.1351	0.3884	0.2212	0.29488	0.111329	36.7803	37.5361	21.5652	38.5515	28.055	0.1635
	* Normality test: Shapiro-Wilk test
	** For percentages, statistical analysis is performed on data processed with angular transformation
