# Supplementary material for: Dentate gyrus development requires a cortical hem-derived astrocytic scaffold
Source: eLife. 2021 Jan 4;10:e63904. doi: 10.7554/eLife.63904 (PMC7806271; doi:10.7554/eLife.63904)
Supplement: Figure 4—figure supplement 1—source data 1. [file elife-63904-fig4-figsupp1-data1.xlsx]

## Sheet: Figure S.8
	Figure 4 - Figure Supplement 1.A		Cxcr4, Vlvdr, Cxcl12 and Reeln fold change (qPCR RQ) in the archicortex (ARK) at E12.5
			Cxcr4 - ARK					Statistical analysis
			E12.5			Average	SD	Normality test*	ANOVA	Comparison (Tukey test)	P value adj.
	Sox9fl/+ Sox1+/+ (n=3)		0.621866	1.53334	0.844796	1	0.475143	0.65	P value: 0.3304 F: 0.731	Sox9fl/+ Sox1+/+ (n=3) vs. Sox9fl/fl Sox1Cre/+ (n=3)	0.9485
	Sox9fl/fl Sox1Cre/+ (n=3)		0.819988	1.02931	0.922535	0.923944	0.104667	0.9597		Sox9fl/+ Sox1+/+ (n=3) vs. Sox9fl/fl Nestin-Cre (n=3)	0.7134
	Sox9fl/fl Nestin-Cre (n=3)		0.723305	1.00813	0.67768	0.803037	0.179071	0.2933		Sox9fl/fl Sox1Cre/+ (n=3) vs. Sox9fl/fl Nestin-Cre (n=3)	0.8764
			Vlvdr - ARK					Statistical analysis
			E12.5			Average	SD	Normality test*	ANOVA	Comparison (Tukey test)	P value adj.
	Sox9fl/+;Sox1+/+ (n=3)		1.3597	0.892726	0.747574	1	0.319852	0.5595	P value: 0.1512 F: 2.631	Sox9fl/+ Sox1+/+ (n=3) vs. Sox9fl/fl Sox1Cre/+ (n=3)	0.155
	Sox9fl/fl;Sox1Cre/+ (n=3)		0.503579	0.115206	0.601772	0.406852	0.257301	0.1878		Sox9fl/+ Sox1+/+ (n=3) vs. Sox9fl/fl Nestin-Cre (n=3)	0.8965
	Sox9fl/fl;Nestin-Cre (n=3)		0.521699	1.32344	0.78692	0.877352	0.408447	0.8713		Sox9fl/fl Sox1Cre/+ (n=3) vs. Sox9fl/fl Nestin-Cre (n=3)	0.2722
			Cxcl12 - ARK					Statistical analysis
			E12.5			Average	SD	Normality test*	ANOVA	Comparison (Tukey test)	P value adj.
	Sox9fl/+ Sox1+/+ (n=3)		0.992812	1.01438	0.992352	0.999847	0.012585	0.0353	P value: 0.0679 F: 4.352	Sox9fl/+ Sox1+/+ (n=3) vs. Sox9fl/fl Sox1Cre/+ (n=3)	0.0939
	Sox9fl/fl Sox1Cre/+ (n=3)		0.717272	0.323221	0.642867	0.56112	0.209359	0.2427		Sox9fl/+ Sox1+/+ (n=3) vs. Sox9fl/fl Nestin-Cre (n=3)	0.0965
	Sox9fl/fl Nestin-Cre (n=3)		0.442452	0.902246	0.349313	0.56467	0.296035	0.4614		Sox9fl/fl Sox1Cre/+ (n=3) vs. Sox9fl/fl Nestin-Cre (n=3)	0.9998
			Reeln - ARK					Statistical analysis
			E12.5			Average	SD	Normality test*	ANOVA	Comparison (Tukey test)	P value adj.
	Sox9fl/+;Sox1+/+ (n=3)		0.965525	1.2078	0.826671	1	0.192891	0.8012	P value: 0.723 F: 0.3426	Sox9fl/+ Sox1+/+ (n=3) vs. Sox9fl/fl Sox1Cre/+ (n=3)	0.7039
	Sox9fl/fl;Sox1Cre/+ (n=3)		1.99915	0.493932	1.56199	1.35169	0.774331	0.3172		Sox9fl/+ Sox1+/+ (n=3) vs. Sox9fl/fl Nestin-Cre (n=3)	0.9418
	Sox9fl/fl;Nestin-Cre (n=3)		0.854638	1.63738	0.933283	1.14177	0.431009	0.2389		Sox9fl/fl Sox1Cre/+ (n=3) vs. Sox9fl/fl Nestin-Cre (n=3)	0.8781
	* Normality test: Shapiro-Wilk test
	*** Non-parametrical statistical analysis is used only when most of the sample groups within one analysis are not normally distributed (e.g. 2 out or 3 samples, or 1 out of 2 samples).
