# Supplementary material for: Dentate gyrus development requires a cortical hem-derived astrocytic scaffold
Source: eLife. 2021 Jan 4;10:e63904. doi: 10.7554/eLife.63904 (PMC7806271; doi:10.7554/eLife.63904)
Supplement: Figure 4—source data 1. [file elife-63904-fig4-data1.xlsx]

## Sheet: Figure 4
	Fig. 4.C	Analysis of GFAP expression
			GFAP+ pixel area						Statistical analysis
			E18.5				Average	SD	Normality test*	ANOVA	Comparison (Tukey test)			P value adj.	Comparison (Student test)		P value
	Sox9fl/+;Sox1+/+ (n=4)		11829	18004.1	25779.4	32667.4	22070	9082.47	0.932	P value: 0.0121 F: 7.498	Sox9fl/+ Sox1+/+ (n=3) vs. Sox9fl/fl Sox1Cre/+ (n=3)			0.0112	Sox9fl/+ Sox1+/+ (n=3) vs. Sox9fl/fl Sox1Cre/+ (n=3)		0.0105
	Sox9fl/fl;Sox1Cre/+ (n=4)		1531.26	3821.8	6225.3	7402.3	4745.16	2609.79	0.7947		Sox9fl/+ Sox1+/+ (n=3) vs. Sox9fl/fl Nestin-Cre (n=3)			0.0609	Sox9fl/+ Sox1+/+ (n=3) vs. Sox9fl/fl Nestin-Cre (n=3)		0.0666
	Sox9fl/fl;Nestin-Cre (n=4)		2979.7	12654.5	6763.4	16818.1	9803.92	6141.1	0.8582		Sox9fl/fl Sox1Cre/+ (n=3) vs. Sox9fl/fl Nestin-Cre (n=3)			0.538
			GFAP+ pixel area						Statistical analysis
			P2				Average	SD	Normality test*	ANOVA	Comparison (Tukey test)			P value adj.
	Sox9fl/+;Sox1+/+ (n=3)		140525	75371.5	150008		121968	40631.5	0.2234	P value: 0.1407 F: 2.768	Sox9fl/+ Sox1+/+ (n=3) vs. Sox9fl/fl Sox1Cre/+ (n=3)			0.1863
	Sox9fl/fl;Sox1Cre/+ (n=3)		64295	44427.6	103959		70893.9	30309.5	0.6377		Sox9fl/+ Sox1+/+ (n=3) vs. Sox9fl/fl Nestin-Cre (n=3)			0.1818
	Sox9fl/fl;Nestin-Cre (n=3)		67592.6	88524.3	55118		70411.6	16880.6	0.7228		Sox9fl/fl Sox1Cre/+ (n=3) vs. Sox9fl/fl Nestin-Cre (n=3)			0.9998
	* Normality test: Shapiro-Wilk test
