# Supplementary material for: Dentate gyrus development requires a cortical hem-derived astrocytic scaffold
Source: eLife. 2021 Jan 4;10:e63904. doi: 10.7554/eLife.63904 (PMC7806271; doi:10.7554/eLife.63904)
Supplement: Figure 5—figure supplement 1—source data 1. [file elife-63904-fig5-figsupp1-data1.xlsx]

## Sheet: Figure S.9
	Figure 5 - Figure Supplement 1.B		Nfia and Nfib fold change (qPCR RQ) in the dorsal telencephalon (DT) and archicortex (ARK) at E12.5
			Nfia - DT					Statistical analysis
			E12.5			Average	SD	Normality test*	ANOVA	Comparison (Student test)	P value
	Sox9fl/+ Sox1+/+ (n=3)		0.788343	1.22001	0.991645	1	0.215956	0.944	N/A	Sox9fl/+ Sox1+/+ (n=3) vs. Sox9fl/fl Sox1Cre/+ (n=3)	0.1139
	Sox9fl/fl Sox1Cre/+ (n=3)		0.822961	0.356728	0.691545	0.623745	0.240398	0.3792
			Nfia - ARK (relative to DT)					Statistical analysis
			E12.5			Average	SD	Normality test*	ANOVA	Comparison (Student test)	P value
	Sox9fl/+;Sox1+/+ (n=3)		1.48751	1.40045	1.33598	1.40798	0.0760441	0.8651	N/A	Sox9fl/+ Sox1+/+ (n=3) vs. Sox9fl/fl Sox1Cre/+ (n=3)	0.1547
	Sox9fl/fl;Sox1Cre/+ (n=3)		0.766786	0.82239	1.45387	1.01435	0.381649	0.1908
			Nfib - DT					Statistical analysis
			E12.5			Average	SD	Normality test*	ANOVA	Comparison (Student test)	P value
	Sox9fl/+ Sox1+/+ (n=3)		0.877873	1.3132	0.808929	1	0.273419	0.3024	N/A	Sox9fl/+ Sox1+/+ (n=3) vs. Sox9fl/fl Sox1Cre/+ (n=3)	0.4491
	Sox9fl/fl Sox1Cre/+ (n=3)		0.700319	0.562172	1.144	0.802163	0.303989	0.586
			Nfib - ARK (relative to DT)					Statistical analysis
			E12.5			Average	SD	Normality test*	ANOVA	Comparison (Student test)	P value
	Sox9fl/+;Sox1+/+ (n=3)		1.75818	1.46519	1.24754	1.4903	0.256247	0.931	N/A	Sox9fl/+ Sox1+/+ (n=3) vs. Sox9fl/fl Sox1Cre/+ (n=3)	0.1349
	Sox9fl/fl;Sox1Cre/+ (n=3)		0.751625	1.05123	1.36896	1.05727	0.308714	0.8689
	* Normality test: Shapiro-Wilk test
