# Supplementary material for: Dentate gyrus development requires a cortical hem-derived astrocytic scaffold
Source: eLife. 2021 Jan 4;10:e63904. doi: 10.7554/eLife.63904 (PMC7806271; doi:10.7554/eLife.63904)
Supplement: Figure 5—source data 1. [file elife-63904-fig5-data1.xlsx]

## Sheet: Figure 5
	Fig. 5.E	Analysis of ALDH1L1+ cells at E13.5 and E16.5
			ALDH1L1+ cells								Statistical analysis
			E13.5						Average	SD	Normality test*	ANOVA	Comparison (Tukey test)			P value adj.
	Sox9fl/+;Sox1+/+ (n=6)		21.5	12.75	8.33	16.25	11	15	14.1383	4.58059	0.9522	P value: 0.0242 F: 5.793	Sox9fl/+ Sox1+/+ (n=3) vs. Sox9fl/fl Sox1Cre/+ (n=3)			0.0193
	Sox9fl/fl;Sox1Cre/+ (n=3)		8.8	3.33	1.17				4.43333	3.93284	0.5313		Sox9fl/+ Sox1+/+ (n=3) vs. Sox9fl/fl Nestin-Cre (n=3)			0.5373
	Sox9fl/fl;Nestin-Cre (n=3)		11.5	8.5	13				11	2.29129	0.6369		Sox9fl/fl Sox1Cre/+ (n=3) vs. Sox9fl/fl Nestin-Cre (n=3)			0.1692
									31.3568
			ALDH1L1+ cells					Statistical analysis
			E16.5			Average	SD	Normality test*	ANOVA	Comparison (Tukey test)			P value adj.
	Sox9fl/+;Sox1+/+ (n=3)		41.83	31.4	45.4	39.5433	7.27473	0.4735	P value: 0.0147 F: 9.244	Sox9fl/+ Sox1+/+ (n=3) vs. Sox9fl/fl Sox1Cre/+ (n=3)			0.0338
	Sox9fl/fl;Sox1Cre/+ (n=3)		16.2	16.8	13.75	15.5833	1.61581	0.3567		Sox9fl/+ Sox1+/+ (n=3) vs. Sox9fl/fl Nestin-Cre (n=3)			0.8288
	Sox9fl/fl;Nestin-Cre (n=3)		48.6	53.6	29	43.7333	13.0021	0.3695		Sox9fl/fl Sox1Cre/+ (n=3) vs. Sox9fl/fl Nestin-Cre (n=3)			0.017
	Fig. 5.F	Aldh1l1 fold change (qPCR RQ) in the archicortex (ARK) at E12.5
			Aldh1l1 - DT					Statistical analysis
			E12.5			Average	SD	Normality test*	ANOVA	Comparison (Tukey test)			P value adj.
	Sox9fl/+ Sox1+/+ (n=3)		0.858492	1.45284	0.688666	1	0.401259	0.5566	P value: 0.165 F: 2.47	Sox9fl/+ Sox1+/+ (n=3) vs. Sox9fl/fl Sox1Cre/+ (n=3)			0.62
	Sox9fl/fl Sox1Cre/+ (n=3)		1.13357	0.485612	0.501346	0.706844	0.369642	0.0634		Sox9fl/+ Sox1+/+ (n=3) vs. Sox9fl/fl Nestin-Cre (n=3)			0.4719
	Sox9fl/fl Nestin-Cre (n=3)		1.06133	1.73013	1.33781	1.37642	0.336064	0.9421		Sox9fl/fl Sox1Cre/+ (n=3) vs. Sox9fl/fl Nestin-Cre (n=3)			0.1465
			Aldh1l1 - ARK (relative to DT)					Statistical analysis
			E12.5			Average	SD	Normality test*	ANOVA	Comparison (Tukey test)			P value adj.
	Sox9fl/+ Sox1+/+ (n=3)		2.0461	2.53481	1.7899	2.1236	0.378455	0.7467	P value: 0.005 F: 14.49	Sox9fl/+ Sox1+/+ (n=3) vs. Sox9fl/fl Sox1Cre/+ (n=3)			0.006
	Sox9fl/fl Sox1Cre/+ (n=3)		0.956527	1.16463	0.801002	0.974054	0.182449	0.9428		Sox9fl/+ Sox1+/+ (n=3) vs. Sox9fl/fl Nestin-Cre (n=3)			0.753
	Sox9fl/fl Nestin-Cre (n=3)		2.23904	1.76893	1.8543	1.95409	0.250435	0.3631		Sox9fl/fl Sox1Cre/+ (n=3) vs. Sox9fl/fl Nestin-Cre (n=3)			0.0127
	* Normality and lognormality test: Shapiro-Wilk test
