# Supplementary material for: Dentate gyrus development requires a cortical hem-derived astrocytic scaffold
Source: eLife. 2021 Jan 4;10:e63904. doi: 10.7554/eLife.63904 (PMC7806271; doi:10.7554/eLife.63904)
Supplement: Figure 6—source data 1. [file elife-63904-fig6-data1.xlsx]

## Sheet: Figure 5
	Fig. 6.D	Analysis of ALDH1L1+ cells at E13.5
			ALDH1L1+ cells								Statistical analysis
			E13.5						Average	SD	Lognormality test*	ANOVA	Comparison (Student test)			P value adj.
	Sox9fl/+ (n=6)		21.5	12.75	8.33	16.25	11	15	14.1383	4.58059	0.9986	N/A	Sox9fl/+ (n=3) vs. Sox9fl/fl;Wnt3airesCre/+ (n=3)			0.0424
	Wnt3airesCre/+ (n=3)		4.5	9.6	6.75				6.95	2.55588	0.9226
									49.1571
	Logarithmic trasformation of data from previous samples (because of lognormal distribution)
			ALDH1L1+ cells								Statistical analysis
			E13.5						Average	SD	Normality test*	ANOVA	Comparison (Student test)			P value adj.
	Sox9fl/+ (n=3)		3.06805	2.54553	2.11986	2.78809	2.3979	2.70805	N/A	N/A	0.9986	N/A	Sox9fl/+ (n=3) vs. Sox9fl/fl;Wnt3airesCre/+ (n=3)			0.022
	Wnt3airesCre/+ (n=3)		1.50408	2.26176	1.90954				N/A	N/A	0.9226
	Fig. 6.E	Analysis of GFAP expression in Fimrbial Scaffold (FS) and Supragranular Scaffold (SGS) separately by pixel area
			pixel area FS				pixel area SGS				Average FS	SD FS	Average SGS	SD SGS	Normality FS	Normality SGS	2 way ANOVA	Comparison (Sidak test)			adj. P value	Comparison (Sidak test)			adj. P value
	Sox9fl/fl Sox1+/+ (n=4)		30542.3	15241	20561.4	38112.9	29908.3	21832.1	16720.1	37781	26114.4	10208.4	26560.4	9242.99	0.8172	0.8795	Interaction, P value: 0.0027	Sox9fl/fl Sox1+/+ (n=4) vs. Sox9fl/fl Sox1Cre/+ (n=4)			0.0029	Sox9fl/fl Sox1+/+ (n=4) vs. Sox9fl/fl Sox1Cre/+ (n=4)			0.0377
	Sox9fl/fl Sox1Cre/+ (n=4)		2738.1	2170.7	4588.1	3934.2	5289.57	11114.5	15794.3	8467.3	3357.77	1101.38	10166.4	4443.82	0.7225	0.9595		Sox9fl/fl Sox1+/+ (n=4) vs. Sox9fl/fl Nestin-Cre (n=4)			0.0677	Sox9fl/fl Sox1+/+ (n=4) vs. Sox9fl/fl Nestin-Cre (n=4)			0.0249
	Sox9fl/fl Nestin-Cre (n=4)		3755.1	15749.9	9425.6	16287.2	6850.3	9535.7	9618.1	10381.3	11304.5	5919.25	9096.35	1545	0.3769	0.1722		Sox9fl/fl Sox1+/+ (n=4) vs. Sox9fl/fl Wnt3airesCre/+ (n=3)			0.043	Sox9fl/fl Sox1+/+ (n=4) vs. Sox9fl/fl Wnt3airesCre/+ (n=3)			0.1029
	Sox9fl/fl Wnt3airesCre/+ (n=3)		8064.4	8496.3	9790.6		22668.7	58664.9	42478.5		8783.77	898.287	41270.7	18028.5	0.4637	0.8891		Sox9fl/fl Sox1Cre/+ (n=4) vs. Sox9fl/fl Nestin-Cre (n=4)			0.5061	Sox9fl/fl Sox1Cre/+ (n=4) vs. Sox9fl/fl Nestin-Cre (n=4)			0.9975
																		Sox9fl/fl Sox1Cre/+ (n=4) vs. Sox9fl/fl Wnt3airesCre/+ (n=3)			0.8091	Sox9fl/fl Sox1Cre/+ (n=4) vs. Sox9fl/fl Wnt3airesCre/+ (n=3)			0.0002
																		Sox9fl/fl Nestin-Cre (n=4) vs. Sox9fl/fl Wnt3airesCre/+ (n=3)			0.9754	Sox9fl/fl Nestin-Cre (n=4) vs. Sox9fl/fl Wnt3airesCre/+ (n=3)			0.0001
	* Normality and lognormality tests: Shapiro-Wilk test
