# Supplementary material for: Dentate gyrus development requires a cortical hem-derived astrocytic scaffold
Source: eLife. 2021 Jan 4;10:e63904. doi: 10.7554/eLife.63904 (PMC7806271; doi:10.7554/eLife.63904)
Supplement: Figure 7—source data 1. [file elife-63904-fig7-data1.xlsx]

## Sheet: Figure 7
	Fig. 7.B	Quantification of PROX1+ granule neurons
			PROX1+ cells					Statistical analysis
			E18.5			Average	SD	Normality test *	ANOVA	Comparison (Student test)			P value
	Sox9fl/+ (n=3)		2044	2407	2740	2397	348.108	0.9525	N/A	Sox9fl/+ (n=3) vs. Sox9fl/fl;Wnt3airesCre/+ (n=3)			0.0614
	Sox9fl/fl; Wnt3airesCre/+ (n=3)		1772	1926	1896	1864.67	81.6415	0.3529
	Fig. 7.C	Quantification of PROX1+ granule neurons distribution in the forming DG (Bins 1-10) at E18.5
			% of PROX1+ cells per bin
			E18.5			Average	SD
Bin#1	Sox9fl/+ (n=3)		0.017	0.038	0.039	0.0313333	0.0124231
	Sox9fl/fl; Wnt3airesCre/+ (n=3)		0.036	0.045	0.05	0.0436667	0.0070946
Bin#2	Sox9fl/+ (n=3)		0.125	0.15	0.132	0.135667	0.012897
	Sox9fl/fl; Wnt3airesCre/+ (n=3)		0.159	0.134	0.191	0.161333	0.0285715
Bin#3	Sox9fl/+ (n=3)		0.158	0.136	0.123	0.139	0.0176918
	Sox9fl/fl; Wnt3airesCre/+ (n=3)		0.139	0.134	0.15	0.141	0.00818535
Bin#4	Sox9fl/+ (n=3)		0.14	0.131	0.114	0.128333	0.0132035
	Sox9fl/fl; Wnt3airesCre/+ (n=3)		0.106	0.098	0.107	0.103667	0.00493288
Bin#5	Sox9fl/+ (n=3)		0.098	0.112	0.107	0.105667	0.0070946
	Sox9fl/fl; Wnt3airesCre/+ (n=3)		0.103	0.104	0.082	0.0963333	0.0124231
Bin#6	Sox9fl/+ (n=3)		0.094	0.11	0.1	0.101333	0.0080829
	Sox9fl/fl; Wnt3airesCre/+ (n=3)		0.091	0.093	0.079	0.0876667	0.00757188
Bin#7	Sox9fl/+ (n=3)		0.112	0.121	0.105	0.112667	0.00802081
	Sox9fl/fl; Wnt3airesCre/+ (n=3)		0.103	0.105	0.083	0.097	0.0121655
Bin#8	Sox9fl/+ (n=3)		0.137	0.126	0.131	0.131333	0.00550757
	Sox9fl/fl; Wnt3airesCre/+ (n=3)		0.113	0.121	0.112	0.115333	0.00493288
Bin#9	Sox9fl/+ (n=3)		0.093	0.058	0.112	0.0876667	0.0273922
	Sox9fl/fl; Wnt3airesCre/+ (n=3)		0.108	0.1147	0.1148	0.1125	0.00389744
Bin#10	Sox9fl/+ (n=3)		0.025	0.019	0.038	0.0273333	0.00971253
	Sox9fl/fl; Wnt3airesCre/+ (n=3)		0.04	0.052	0.031	0.041	0.0105357
	Angular trasformation of previous data (because it is a percentage) on which the statistical analysis is performed
			Angular transformation					Statistical analysis
			E18.5			Average	SD	Normality test *	Two-way ANOVA	Comparison (Student test)			P value adj.
Bin#1	Sox9fl/+ (n=3)		7.49179	11.241	11.3899	N/A	N/A	0.0648	P value: Interaction = 0.0095; Row Factor <0.0001; Column Factor = 0.6371	Sox9fl/+ (n=3) vs. Sox9fl/fl;Wnt3airesCre/+ (n=3)			0.5283
	Sox9fl/fl; Wnt3airesCre/+ (n=3)		10.9374	12.2473	12.921	N/A	N/A	0.6476
Bin#2	Sox9fl/+ (n=3)		20.7048	22.7865	21.3041	N/A	N/A	0.5396		Sox9fl/+ (n=3) vs. Sox9fl/fl;Wnt3airesCre/+ (n=3)			0.5051
	Sox9fl/fl; Wnt3airesCre/+ (n=3)		23.4999	21.4728	25.9149	N/A	N/A	0.9057
Bin#3	Sox9fl/+ (n=3)		23.4215	21.6405	20.531	N/A	N/A	0.7459		Sox9fl/+ (n=3) vs. Sox9fl/fl;Wnt3airesCre/+ (n=3)			>0.9999
	Sox9fl/fl; Wnt3airesCre/+ (n=3)		21.8901	21.4728	22.7865	N/A	N/A	0.6048
Bin#4	Sox9fl/+ (n=3)		21.9728	21.2193	19.7331	N/A	N/A	0.6401		Sox9fl/+ (n=3) vs. Sox9fl/fl;Wnt3airesCre/+ (n=3)			0.395
	Sox9fl/fl; Wnt3airesCre/+ (n=3)		19.0005	18.2431	19.0934	N/A	N/A	0.1843
Bin#5	Sox9fl/+ (n=3)		18.2431	19.5521	19.0934	N/A	N/A	0.6749		Sox9fl/+ (n=3) vs. Sox9fl/fl;Wnt3airesCre/+ (n=3)			0.9948
	Sox9fl/fl; Wnt3airesCre/+ (n=3)		18.7195	18.8136	16.6399	N/A	N/A	0.07
Bin#6	Sox9fl/+ (n=3)		17.8541	19.3697	18.4349	N/A	N/A	0.7405		Sox9fl/+ (n=3) vs. Sox9fl/fl;Wnt3airesCre/+ (n=3)			0.9207
	Sox9fl/fl; Wnt3airesCre/+ (n=3)		17.5575	17.7557	16.324	N/A	N/A	0.2455
Bin#7	Sox9fl/+ (n=3)		19.5521	20.3559	18.9072	N/A	N/A	0.8709		Sox9fl/+ (n=3) vs. Sox9fl/fl;Wnt3airesCre/+ (n=3)			0.8592
	Sox9fl/fl; Wnt3airesCre/+ (n=3)		18.7195	18.9072	16.7441	N/A	N/A	0.1511
Bin#8	Sox9fl/+ (n=3)		21.724	20.7913	21.2193	N/A	N/A	0.9171		Sox9fl/+ (n=3) vs. Sox9fl/fl;Wnt3airesCre/+ (n=3)			0.8994
	Sox9fl/fl; Wnt3airesCre/+ (n=3)		19.6428	20.3559	19.5521	N/A	N/A	0.1939
Bin#9	Sox9fl/+ (n=3)		17.7557	13.9356	19.5521	N/A	N/A	0.6067		Sox9fl/+ (n=3) vs. Sox9fl/fl;Wnt3airesCre/+ (n=3)			0.2207
	Sox9fl/fl; Wnt3airesCre/+ (n=3)		19.1859	19.7961	19.8051	N/A	N/A	0.0269
Bin#10	Sox9fl/+ (n=3)		9.09744	7.9229	11.241	N/A	N/A	0.6841		Sox9fl/+ (n=3) vs. Sox9fl/fl;Wnt3airesCre/+ (n=3)			0.3929
	Sox9fl/fl; Wnt3airesCre/+ (n=3)		11.537	13.1814	10.1408	N/A	N/A	0.913
	Fig. 7.D	Analysis of PROX1+ granule neuron distribution between DG upper and lower blade
			Average Bin 1 to 5			average	SD	Normality test *	Angular transformation
	Sox9fl/+;Sox1+/+ (n=3)		0.538	0.567	0.515	0.54	0.0260576	0.8707	47.1793	48.8504	45.8596
	Sox9fl/fl;Sox1Cre/+ (n=3)		0.614	0.646	0.646	0.635333	0.0184752	0.75	51.5897	53.4889	53.4889
	Sox9fl/fl;Nestin-Cre (n=3)		0.58	0.684	0.539	0.601	0.0747462	0.5176	49.6034	55.7962	47.2368
	Sox9fl/fl;Wnt3airesCre/+ (n=3)		0.543	0.515	0.58	0.546	0.0326037	0.8444	47.4668	45.8596	49.6034
												Statistical analysis
			Average Bin 6 to 10			average	SD	Normality test *	Angular transformation			2 way ANOVA	Comparison (Sidak test)			adj. P value
	Sox9fl/+;Sox1+/+ (n=3)		0.461	0.434	0.486	0.460333	0.0260064	0.9553	42.7632	41.2074	44.1978	Interaction, P value: 0.0044	(Bin 1 to 5 vs. Bin 6 to 10)			0.1659
	Sox9fl/fl;Sox1Cre/+ (n=3)		0.384	0.355	0.354	0.364333	0.0170392	0.7752	38.2926	36.571	36.5111					<0.0001
	Sox9fl/fl;Nestin-Cre (n=3)		0.42	0.316	0.46	0.398667	0.0743326	0.5075	40.3966	34.2038	42.7057					0.0002
	Sox9fl/fl;Wnt3airesCre/+ (n=3)		0.455	0.4857	0.4198	0.4535	0.0329756	0.9213	42.4182	44.1806	40.3849					0.0852
			Bin 1 to 5		Bin 6 to 10
			average	SD	average	SD
	Sox9fl/+;Sox1+/+ (n=3)		0.54	0.0260576	0.460333	0.0260064
	Sox9fl/fl;Sox1Cre/+ (n=3)		0.635333	0.0184752	0.364333	0.0170392
	Sox9fl/fl;Nestin-Cre (n=3)		0.601	0.0747462	0.398667	0.0743326
	Sox9fl/fl;Wnt3airesCre/+ (n=3)		0.546	0.0326037	0.4535	0.0329756
	Fig. 7.F	Quantification of TBR2+ progenitors at E18.5
			TBR2+ cells					Statistical analysis
			E18.5			Average	SD	Normality test*	ANOVA ***	Comparison (Student test)			P value
	Sox9fl/+ (n=3)		2069	1977	1956	2000.67	60.1027	0.3354	N/A	Sox9fl/+ (n=3) vs. Sox9fl/fl;Wnt3airesCre/+ (n=3)			0.054
	Sox9fl/fl; Wnt3airesCre/+ (n=3)		2260	2069	2256	2195	109.138	0.035
	Fig. 7.G	Distribution of TBR2+ cells along primary, secondary and tertiary matrices at E18.5
			TBR2+ cells - Matrix 1					Statistical analysis
			E18.5			Average	SD	Normality test*	ANOVA	Comparison (Student test)			P value
	Sox9fl/+ (n=3)		83.2	86.2	93.2	87.5333	5.1316	0.5665	N/A	Sox9fl/+ (n=3) vs. Sox9fl/fl;Wnt3airesCre/+ (n=3)			0.7224
	Sox9fl/fl; Wnt3airesCre/+ (n=3)		117.2	68	94	93.0667	24.6133	0.9373
			TBR2+ cells - Matrix 2					Statistical analysis
			E18.5			Average	SD	Normality test*	ANOVA ***	Comparison (Student test)			P value
	Sox9fl/+ (n=3)		178	181	181.2	180.067	1.79258	0.1066	N/A	Sox9fl/+ (n=3) vs. Sox9fl/fl;Wnt3airesCre/+ (n=3)			0.0001
	Sox9fl/fl; Wnt3airesCre/+ (n=3)		231.6	222.4	231.8	228.6	5.37029	0.0356
			TBR2+ cells - Matrix 3					Statistical analysis
			E18.5			Average	SD	Normality test*	ANOVA	Comparison (Student test)			P value
	Sox9fl/+ (n=3)		152.6	128.2	116.8	132.533	18.2892	0.6053	N/A	Sox9fl/+ (n=3) vs. Sox9fl/fl;Wnt3airesCre/+ (n=3)			0.2981
	Sox9fl/fl; Wnt3airesCre/+ (n=3)		103.2	123.4	125.4	117.333	12.2806	0.1557
	* this value is due to two samples being very similar, we have therefore assumed that data was distributed normally
	Fig. 7.J	Analysis of 1/2 matrix size (TBR2+ cells)
			%TBR2+ cells in 1/2 matrix / TBR2+ cells in 2ry matrix					Angular transformation**			Statistical analysis
			E18.5			Average	SD	E18.5 and P2			Normality test*	ANOVA	Comparison (Tukey test)			P value adj.
	Sox9fl/fl;Sox1Cre/+ (n=3)		0.314	0.3532	0.356	0.341067	0.0234822	34.0805	36.4632	36.6309	0.1131	P value: 0.0742 F: 4.138	Sox9fl/fl Sox1Cre/+ (n=3) vs. Sox9fl/fl Nestin-Cre (n=3)			0.1781
	Sox9fl/fl;Nestin-Cre (n=3)		0.3159	0.2824	0.254	0.2841	0.030985	34.1977	32.101	30.2639	0.9253		Sox9fl/fl Sox1Cre/+ (n=3) vs. Sox9fl/fl Wnt3airesCre (n=3)			0.0727
	Sox9fl/fl; Wnt3airesCre/+ (n=3)		0.3143	0.2401	0.2425	0.265633	0.0421636	34.099	29.3406	29.5013	0.0554		Sox9fl/fl Nestin-Cre (n=3) vs. Sox9fl/fl Wnt3airesCre (n=3)			0.7699
	* Normality test: Shapiro-Wilk test
	** For percentages, statistical analysis is performed on data processed with angular transformation
	*** Non-parametrical statistical analysis is used only when most of the sample groups within one analysis are not normally distributed (e.g. 2 out or 3 samples).
